# Supplementary material
Source: publisher figshare collection journal article supplement (https://frontiersin.figshare.com/ndownloader/files/24783920)
Supplement: Supplementary file [file 24783920]

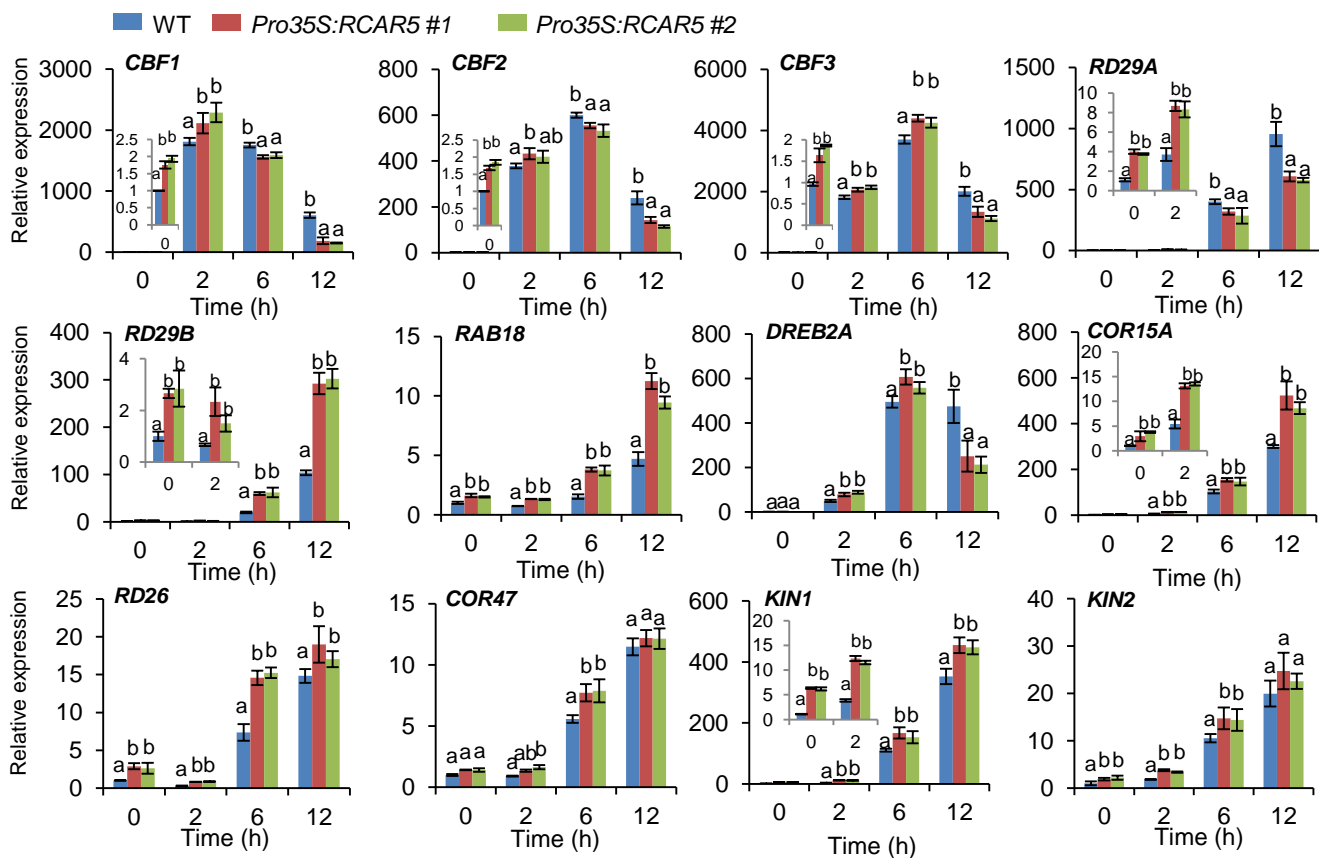

**FIGURE S11** Expression patterns of ABA-responsive genes under cold stress conditions. Two-week-old *Pro35S:RCAR5* and WT plants were exposed to 4°C and shoots were harvested at the indicated time points. *Actin8* were used as an internal control for normalization. The expression level of each gene at 0 h was set to 1.0. Data represent mean  $\pm$  SD of three independent experiments. Different letters indicate significant difference between WT and transgenic plants (ANOVA;  $P < 0.05$ ).
